# Supplementary material for: Supracolloidal fullerene-like cages: design principles and formation mechanisms
Source: Royal Society of Chemistry journal article supplement (doi:10.1039/c6cp05556g), 2016-01-01
Supplement: c6cp05556g1.pdf [file c6cp05556g1.pdf]

## Electronic Supplementary Information

# Supracolloidal Fullerene-Like Cages: Design Principles and Formation Mechanisms

Zhan-Wei Li,<sup>†</sup> You-Liang Zhu,<sup>†</sup> Zhong-Yuan Lu,<sup>‡</sup> and Zhao-Yan Sun<sup>\*,†,¶</sup>

*State Key Laboratory of Polymer Physics and Chemistry, Changchun Institute of Applied Chemistry, Chinese Academy of Sciences, Changchun 130022, China, State Key Laboratory of Supramolecular Structure and Materials, Institute of Theoretical Chemistry, Jilin University, Changchun 130023, China, and Xinjiang Laboratory of Phase Transitions and Microstructures in Condensed Matters, College of Physical Science and Technology, Yili Normal University, Yining, 835000, China*

E-mail: zysun@ciac.ac.cn

---

\*To whom correspondence should be addressed

<sup>†</sup>Changchun Institute of Applied Chemistry

<sup>‡</sup>Jilin University

<sup>¶</sup>Yili Normal University

Table S1: The corresponding relation between the strength of attraction  $\alpha_{ij}^A$  and the adhesion energy  $G$ . In the simulations, increasing  $\alpha_{ij}^A$  corresponds to the increase of the adhesion energy  $G$  in a reasonable range from  $2.00 k_B T$  to  $6.77 k_B T$ , which may represent hydrophobic or hydrogen bond interactions between attractive patches, and can also be tuned by altering salt concentration, pH, or temperature in experiments. The parameters  $\alpha_{ij}^R$  and  $\alpha_{ij}^A$  are given in reduced units, and the reduced unit of length  $r_c$  in the model is assumed to approximately correspond to 10 nm.

| $\alpha_{11}^R$ | $\alpha_{11}^A$ | $G [k_B T]$ |
|-----------------|-----------------|-------------|
| 396             | 88              | 2.00        |
| 396             | 99              | 2.48        |
| 396             | 110             | 3.00        |
| 396             | 121             | 3.54        |
| 396             | 132             | 4.13        |
| 396             | 143             | 4.74        |
| 396             | 154             | 5.39        |
| 396             | 165             | 6.07        |
| 396             | 176             | 6.77        |

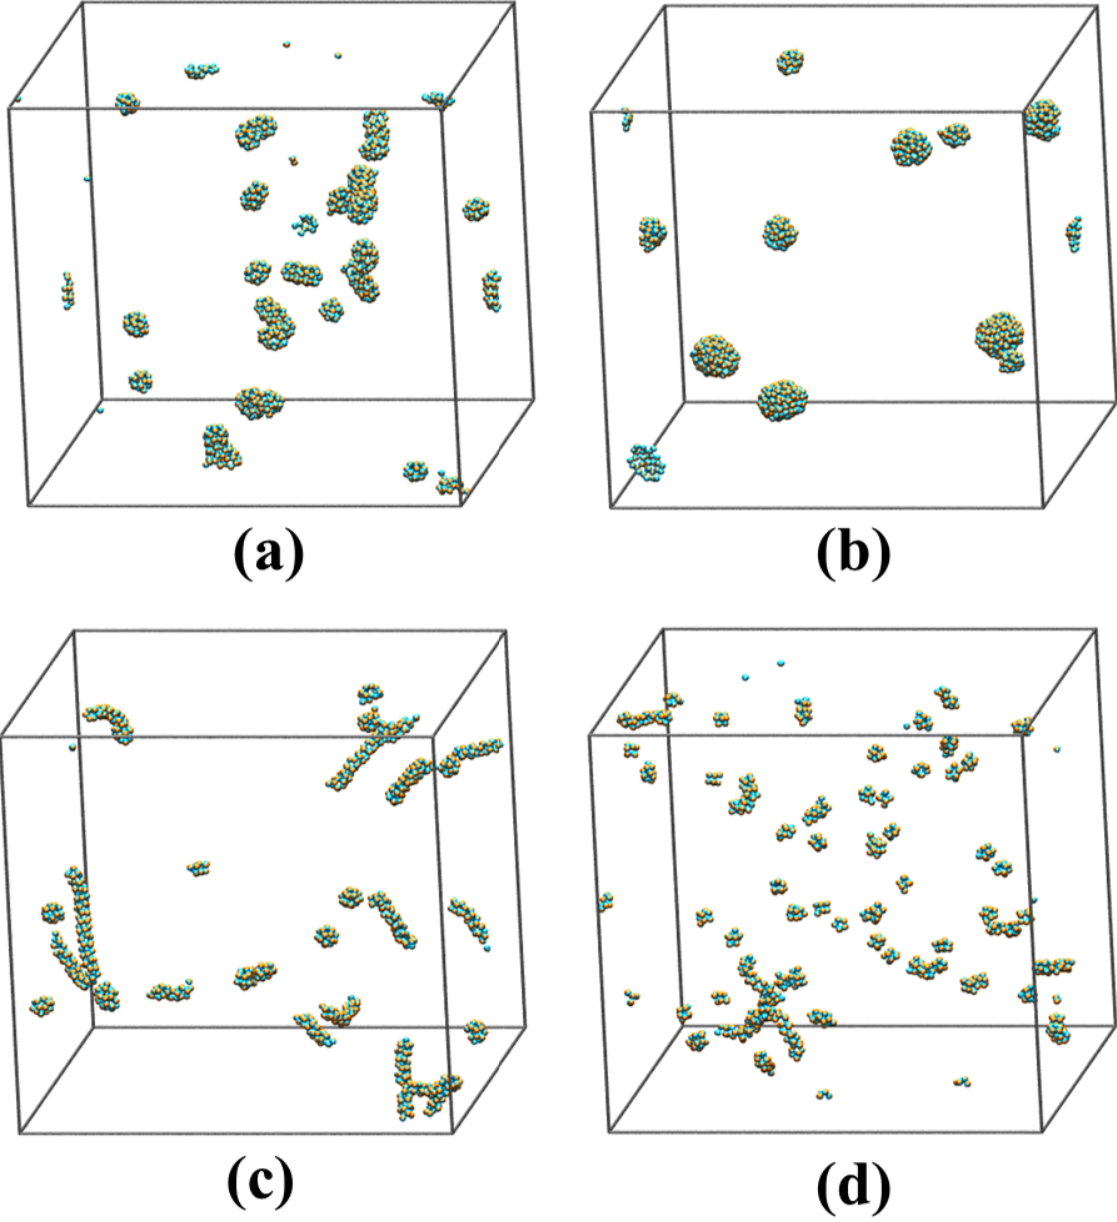

Figure S1: Typical supracolloidal fullerene-like cages observed in Fig.2 with the system size of  $1.92 \times 10^5$  particles in a  $40 \times 40 \times 40$  cubic box at  $\alpha_{ij}^R = 396$  ( $E = 4.0$  MPa),  $\Phi = 0.5\%$ . (a) Fullerene-like cages (FLC). (b) Onion-like cages (OLC). (c) Slender nanotube-like structures (S-NT). (d) Small polyhedra (SPH). For the sake of clarity, we only show patchy solute particles in these systems.

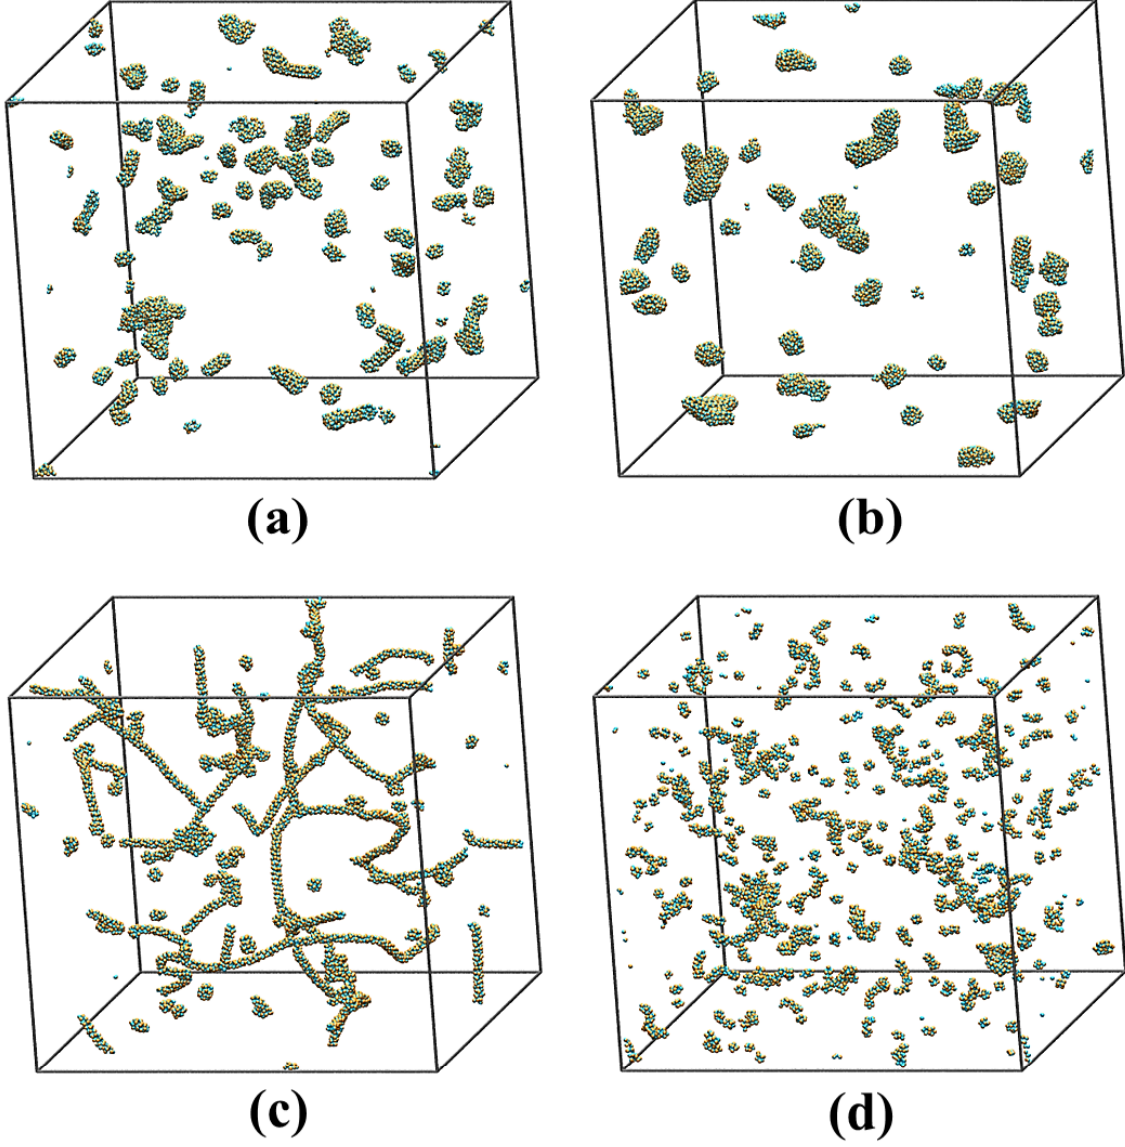

Figure S2: Typical supracolloidal fullerene-like cages observed in Fig.2 with larger system size of  $6.48 \times 10^5$  particles in a  $60 \times 60 \times 60$  cubic box at  $\alpha_{ij}^R = 396$  ( $E = 4.0$  MPa),  $\Phi = 1.0\%$ . (a) Fullerene-like cages (FLC). (b) Onion-like cages (OLC). (c) Slender nanotube-like structures (S-NT). (d) Small polyhedra (SPH).

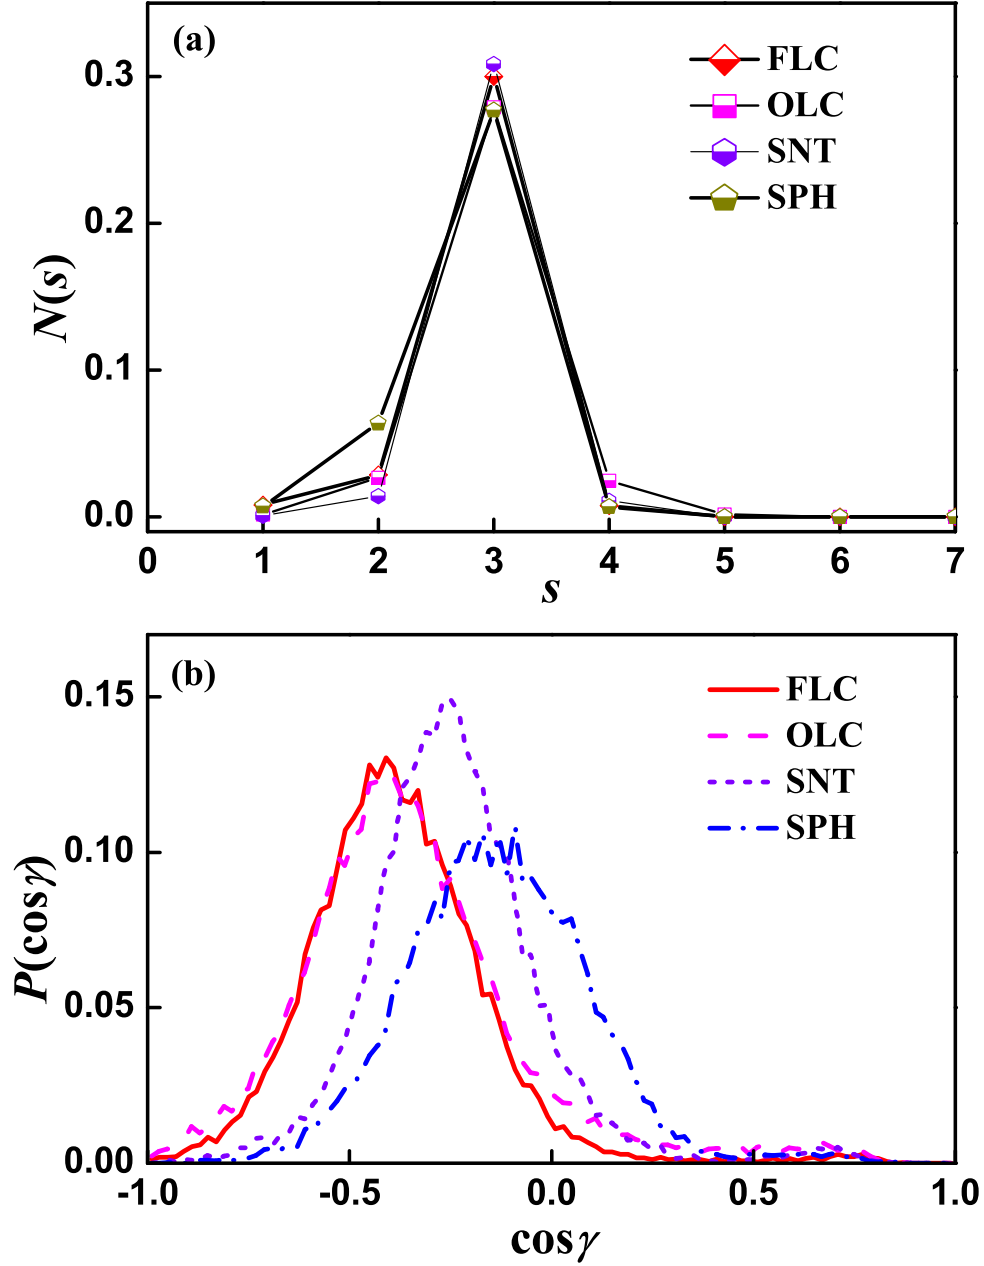

Figure S3: Structural characteristics of typical supracolloidal fullerene-like cages in Fig.S2. (a) Distribution  $N(s)$  of the number of bonds (i.e., contacts) between attractive patches per patchy particle  $s$ . The distributions  $N(s)$  have been normalized so that  $\sum_s sN(s) = 1$ . (b) Distribution  $P(\cos \gamma)$  of the cosine of the angles  $\gamma$  between the edges of the polygons in typical supracolloidal fullerene-like cages. As can be seen in Fig.S3a, for these typical supracolloidal fullerene-like cages in Fig.S2,  $N(s)$  shows a narrow distribution at  $s=3$  since the soft three-patch particles are designed to mimic  $sp^2$  hybridized atomic orbitals in  $C_{60}$ . For FLCs,  $P(\cos \gamma)$  shows a clear peak between  $\cos \gamma \approx -0.50$  and  $\cos \gamma \approx -0.31$ , and the distribution becomes slightly wider for OLCs. For SNTs and SPHs, the distribution  $P(\cos \gamma)$  gradually shifts to larger values of  $\cos \gamma$ .
